# Supplementary material for: HSP90β controls NLRP3 autoactivation
Source: PubMed Central journal article supplement (PMC10901362; doi:10.1126/sciadv.adj6289), 2024-02-28
Supplement: sciadv.adj6289_sm.pdf [file sciadv.adj6289_sm.pdf]

Supplementary Materials for  
**HSP90 $\beta$  controls NLRP3 autoactivation**

Lotte Spel *et al.*

Corresponding author: Fabio Martinon, [fabio.martinon@unil.ch](mailto:fabio.martinon@unil.ch)

*Sci. Adv.* **10**, eadj6289 (2024)  
DOI: 10.1126/sciadv.adj6289

**The PDF file includes:**

Figs. S1 to S3  
Tables S1 and S2  
Legends for data S1 and S2

**Other Supplementary Material for this manuscript includes the following:**

Data S1 and S2

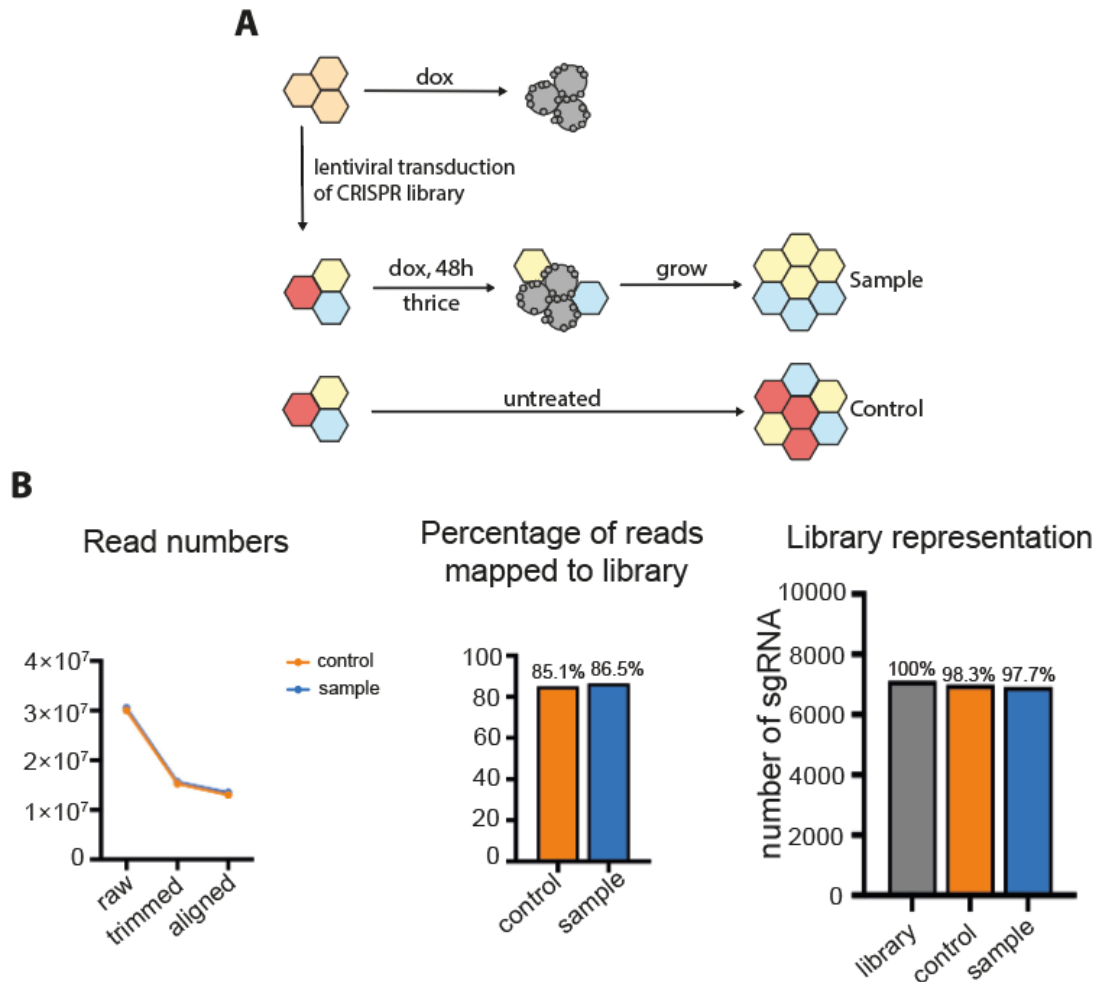

**Fig. S1. CAPS survival screen specifications.** **A)** Schematic overview of genome-wide CRISPR knock-out screen performed in U937 NLRP3 R260W cells. A CRISPR library was introduced into the cells by lentiviral transduction generating a mutagenized population. Mutagenized cells were treated with doxycycline and surviving cells were collected (sample) or left untreated (control). Genomic DNA was isolated, sgRNA sequences were amplified by PCR and sequenced. **B)** Specifications of performed CRISPR knock-out screen: number of reads obtained after sequencing for the control and sample; percentage of reads that could be mapped to the sgRNA library; and representation of the total sgRNA library by the control and sample.

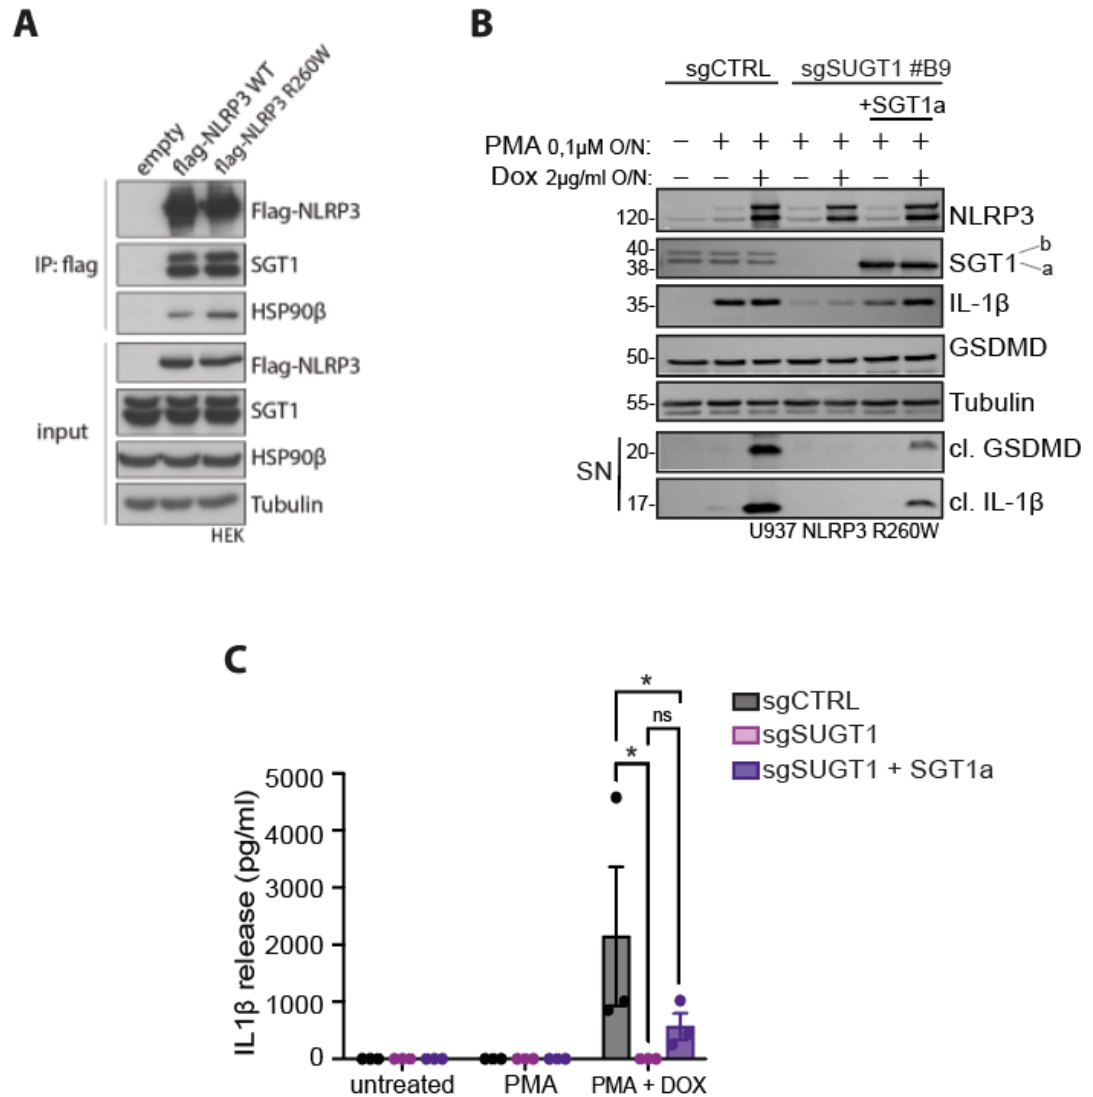

**Fig. S2. The SGT1/HSP90β complex is required for NLRP3 inflammasome functionality.**

**A)** HEK-293T cells were transfected with empty plasmid, or plasmids encoding for Flag-NLRP3 or Flag-NLRP3 R260W. Immunoprecipitation with immobilized anti-Flag were analysed by immunoblot for SGT1, HSP90β and Flag-tagged NLRP3 proteins. **B-C)** Inflammasome activation in U937 NLRP3 R260W control cells or depleted for SGT1 (sgSUGT1) or reconstituted with a CRISPR-resistant SGT1a. Cells are treated with PMA and doxycycline overnight. Protein expression and release of inflammasome activation markers are measured by western blot (**B**). Release of cleaved IL-1β in the supernatant is quantified by ELISA (**C**). Western blots and ELISA are representative of three independent experiments. ELISA data represented as mean ± SD and tested for statistical significance using the non-parametric Mann-Whitney U test ( $p \leq 0.05$  is considered significant and indicated with \*; ns = not significant).

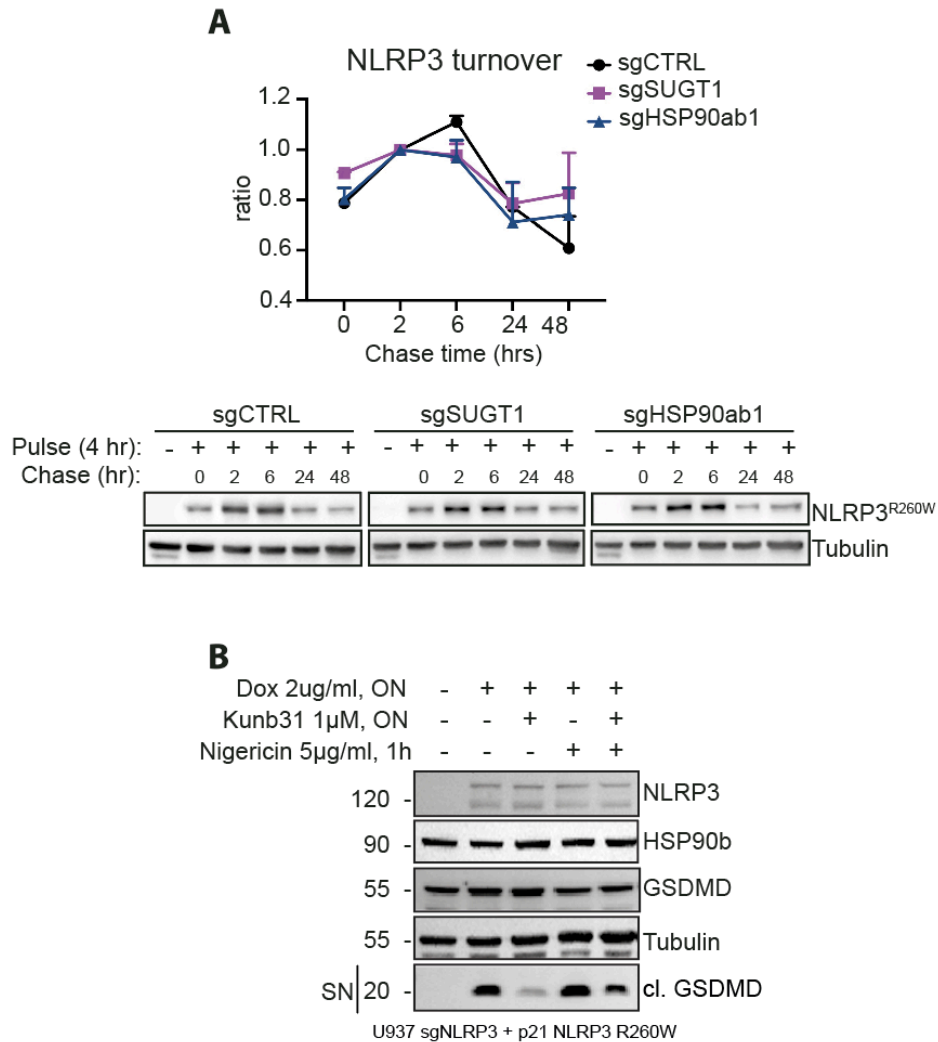

**Fig. S3. Impact of HSP90 $\beta$  and SGT1 on NLRP3 protein stability and response to nigericin.**

**A)** NLRP3 turnover in U937 NLRP3 R260W sgCTRL, sgSUGT1 or sgHSP90ab1. Cycloheximide chase is indicated. Representative western-blot for NLRP3 expression from are shown in U937 NLRP3 R260W expressing sgCTRL, sgSUGT1, or sgHSP90ab1. **B)** NLRP3 protein expression and release of inflammasome activation markers are measured by western blot upon treatment with nigericin. Inflammasome activation in U937 deficient in NLRP3 endogenous (sgNLRP3) and reconstituted with a CRISPR-resistant NLRP3 R260W were treated with PMA and dox overnight in the absence or presence of KUNB31 (K31). Then cells were incubated with nigericin for 1 hour. Protein expression and release of inflammasome activation markers are measured by western blot.

**Table S1****CAPS patients' samples and mutation associated**

| <b>Patient</b> | <b>Mutation</b> | <b>Diagnosis</b> |
|----------------|-----------------|------------------|
| 1              | R260W           | MWS              |
| 2              | D303N           | MWS              |
| 3              | D303N           | MWS              |
| 4              | D303N           | MWS              |
| 5              | T348M           | MWS              |
| 6              | T348M           | MWS              |
| 7              | T348M           | CINCA            |
| 8              | M406I           | CINCA            |
| 9              | A439V           | FCAS             |
| 10             | N477K           | CINCA            |
| 11             | F523Y           | CINCA            |
| 12             | F523C           | FCAS             |
| 13             | F523C           | FCAS             |
| 14             | E567K           | CINCA            |
| 15             | E567K           | CINCA            |

**Table S2 Oligonucleotides used in the study**

| Oligo name                                        | 5' to 3' sequence                                                                 |
|---------------------------------------------------|-----------------------------------------------------------------------------------|
| NLRP3 BP cloning fwd                              | GGG GAC AAG TTT GTA CAA AAA AGC AGG CTT CAC<br>CAT GAA GAT GGC AAG CAC CCG CTG CA |
| NLRP3 BP cloning rev                              | GGG GAC CAC TTT GTA CAA GAA AGC TGG GTC CTA<br>CCA AGA AGG CTC AAA GAC GAC GGT CA |
| sgCTRL fwd                                        | CACCGCTTCGAAATGTCCGTTCCGGT                                                        |
| sgCTRL rev                                        | AAACACCGAACGGACATTTTCAAGC                                                         |
| sgSUGT1 #B fwd                                    | CAC CGC CTG GGG GTC CTC GTC GAT T                                                 |
| sgSUGT1 #B rev                                    | AAA CAA TCG ACG AGG ACC CCC AGG C                                                 |
| sgHSP90ab1 #A fwd                                 | CAC CGT CTA GGT GAG CCC ATT GGC A                                                 |
| sgHSP90ab1 #A rev                                 | AAA CTG CCA ATG GGC TCA CCT AGA                                                   |
| sgHSP90ab1 #B fwd                                 | CAC CGA CTT TGG TAC CCC TGC CAA T                                                 |
| sgHSP90ab1 #B rev                                 | AAA CAT TGG CAG GGG TAC CAA AGT                                                   |
| sgHSP90aa1 fwd                                    | CTA ATC GAC TTC TTC CAT GCG AGA CG                                                |
| sgHSP90aa1 rev                                    | CAC CGG CAG TTC TCT AAA AAC ATA A                                                 |
| sgNLRP3 fwd                                       | CAC CGA TCG CAG CGA AGA TCC ACA                                                   |
| sgNLRP3 rev                                       | AAA CTG TGG ATC TTC GCT GCG ATC                                                   |
| SUGT1 resistant to gRNA B fwd                     | CAC CGC CTG GGG GTC CTC GTC GAT T                                                 |
| SUGT1 resistant to gRNA B rev                     | AAA CAA TCG ACG AGG ACC CCC AGG C                                                 |
| HSP90ab1 resistant to gRNA A fwd                  | GTG AGC CCA TTG GCA GAG GTA CCA AAG TGA TCC                                       |
| HSP90ab1 resistant to gRNA A rev                  | GGA TCA CTT TGG TAC CTC TGC CAA TGG GCT CAC                                       |
| INFUSION Cloning SUGT1 into pEF1a-IRES-BFP fwd    | GGA ATT TCG ACA TTT CAC CAT GGC GGC TGC TGC<br>AGC AG                             |
| INFUSION Cloning SUGT1 into pEF1a-IRES-BFP rev    | GGA ATT TCG ACA TTT CAC CAT GGC GGC GGC TGC<br>AGC AG                             |
| INFUSION Cloning HSP90ab1 into pEF1a-IRES-BFP fwd | GGA ATT TCG ACA TTT CAC CAT GCC TGA GGA AGT<br>GCA CCA TGG                        |
| INFUSION Cloning HSP90ab1 into pEF1a-IRES-BFP rev | AGA TTA ATT AAA TTT GCC TAA TCG ACT TCT TCC<br>ATG CG                             |
| NLRP3 point mutation R260W fwd                    | ACT ATC TGT TCT ATA TCC ACT GTT GGG AGG TGA<br>GCC                                |
| NLRP3 point mutation R260W rev                    | GGC TCA CCT CCC AAC AGT GGA TAT AGA ACA GAT<br>AGT                                |
| NLRP3 point mutation L305P fwd                    | CAA AGG CAC CTT GCG GCT CAT CGA AGC CG                                            |
| NLRP3 point mutation L305P rev                    | CGG CTT CGA TGA GCC GCA AGG TGC CTT TG                                            |
| NLRP3 point mutation A352V fwd                    | GCA GTT TCT CCA GGA CCA CAG GTC TCG TG                                            |
| NLRP3 point mutation A352V rev                    | CAC GAG ACC TGT GGT CCT GGA GAA ACT GC                                            |
| NLRP3 point mutation L353P fwd                    | GCT GCA GTT TCT CCG GGG CCA CAG GTC TC                                            |
| NLRP3 point mutation L353P rev                    | GAG ACC TGT GGC CCC GGA GAA ACT GCA GC                                            |
| NLRP3 point mutation F523C fwd                    | GGC AAA GAA CTC CTG GCA AGT CAT GTG GAT GAA GC                                    |
| NLRP3 point mutation F523C rev                    | GCT TCA TCC ACA TGA CTT GCC AGG AGT TCT TTG CC                                    |
| NLRP3 point mutation E567K fwd                    | AAA AAT CAA ATA CCC CTT TTT GAA TTT GCC ATA<br>GTT TTC CAG AAG GA                 |
| NLRP3 point mutation E567K rev                    | TCC TTC TGG AAA ACT ATG GCA AAT TCA AAA AGG<br>GGT ATT TGA TTT TT                 |

**Data S1. (separate file)**

MaGeCk analysis of the screen results including genes rank

**Data S2. (separate file)**

MaGeCk analysis of the screen results including single guide RNAs rank
